# Supplementary material
Source: Springer Nature journal article supplement (https://www.springermedizin.de/resource/supplementary/13012_2011_352_MOESM2_ESM.PDF/9629842)

## Additional file 2

### Flow of studies through the review process

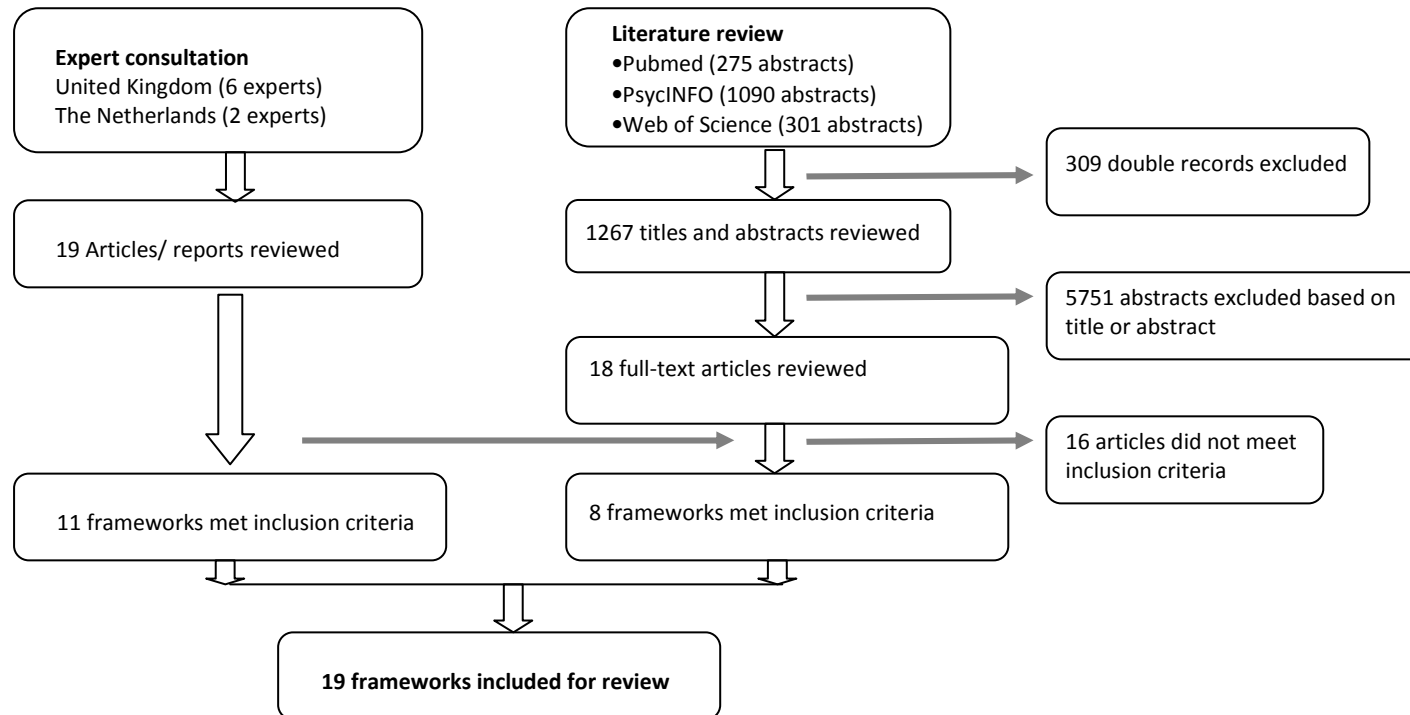

Supplement: MOESM2 [file 9629842]
